# Supplementary material
Source: Royal Society of Chemistry journal article supplement (doi:10.1039/d6ea00035e)
Supplement: d6ea00035e1.pdf [file d6ea00035e1.pdf]

**Supporting Information: A Conceptual  
Framework for the Influence of Water Activity  
Parameterization on Hygroscopic Growth and  
Cloud Droplet Activation in Aerosols Containing  
Strong Nonionic Surfactants**

Alison Bain\*

*Department of Chemistry, Oregon State University, Corvallis, OR, USA.*

E-mail: [alison.bain@oregonstate.edu](mailto:alison.bain@oregonstate.edu)

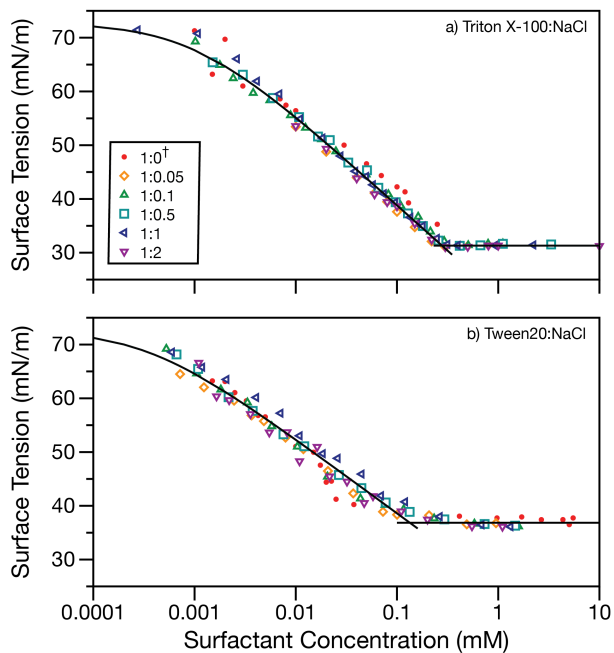

Figure S1: Macroscopic surface tension data for a) Triton X-100 and B) Tween20 in different mole ratio mixtures with NaCl. Langmuir isotherm and plateau region fits for all surfactant-NaCl mole ratios combined are overlaid on each panel. <sup>†</sup>Filled circles for binary surfactant-water data shown for Triton X-100 from Ref. 1 and binary surfactant-water data for Tween20 from Ref. 2 are shown for comparison.

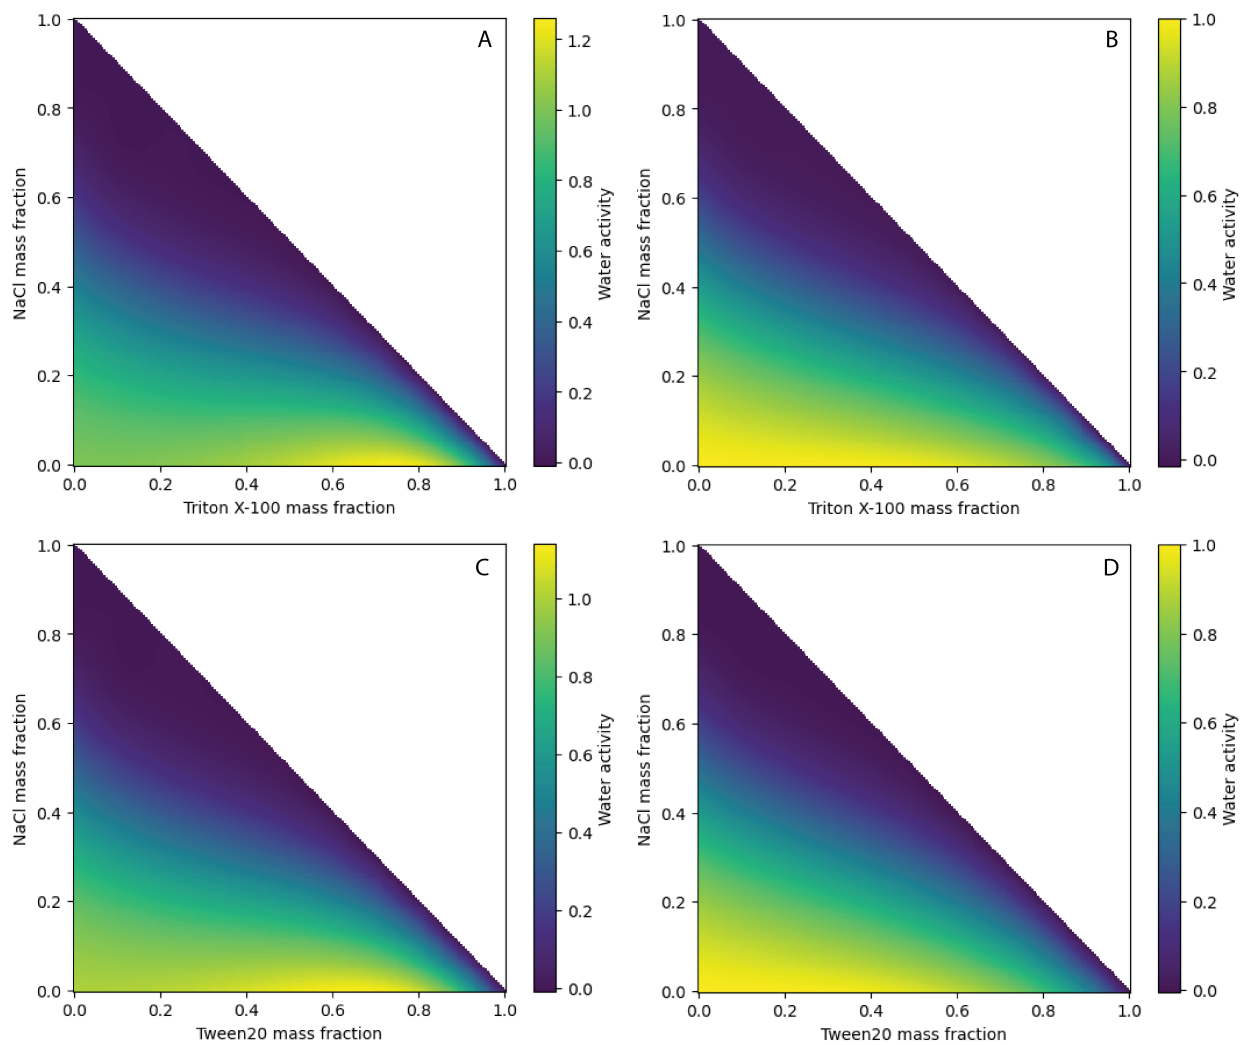

Figure S2: Interpolated water activity from AIOMFAC calculations for Triton X-100 (A/B) and Tween20 (C/D) using the ether-alkyl subgroup description (A/C) and the oxyethylene subgroup description (B/D). Note the corresponding color bar spans the range of calculated water activities for each case. Using the ether-alkyl subgroup descriptions, AIOMFAC outputs water activities greater than one at some solute mass ratios.

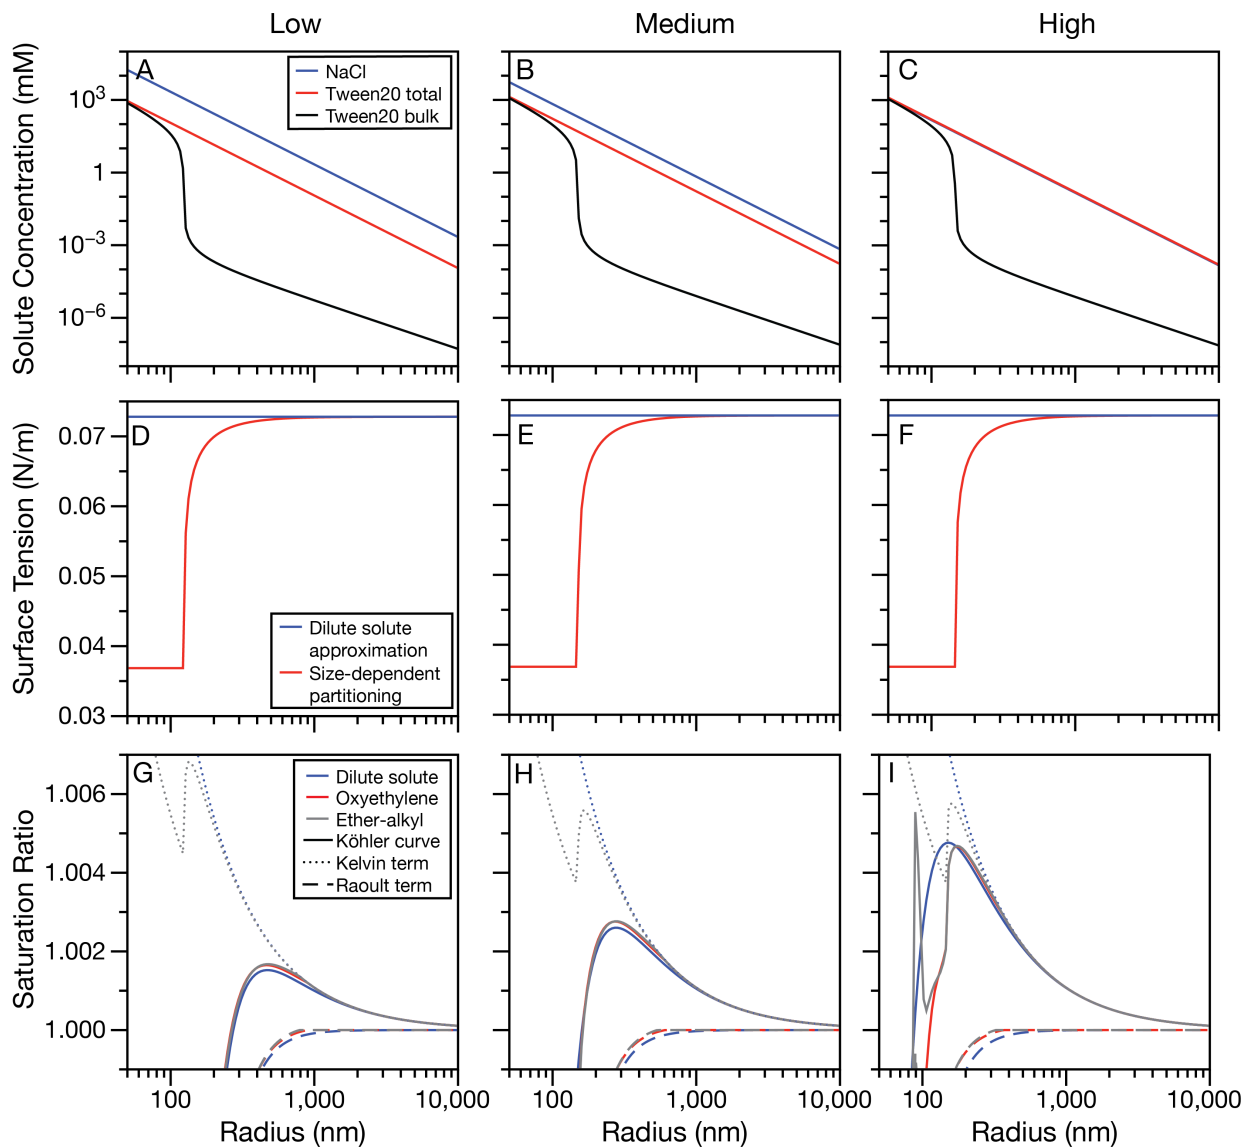

Figure S3: Solute concentration (A-C), surface tension (D-E), and saturation ratio (G-I) for 50 nm radius dry particles containing low (column 1,  $w_{org} = 0.522$ ), medium (column 2,  $w_{org} = 0.838$ ), and high (column 3,  $w_{org} = 0.660$ ) Tween20 mass fractions. Köhler curves are calculated using the dilute solute approximation as well as using the AIOMFAC activity interpolations using the oxyethylene and ether-alkyl subgroup descriptions.

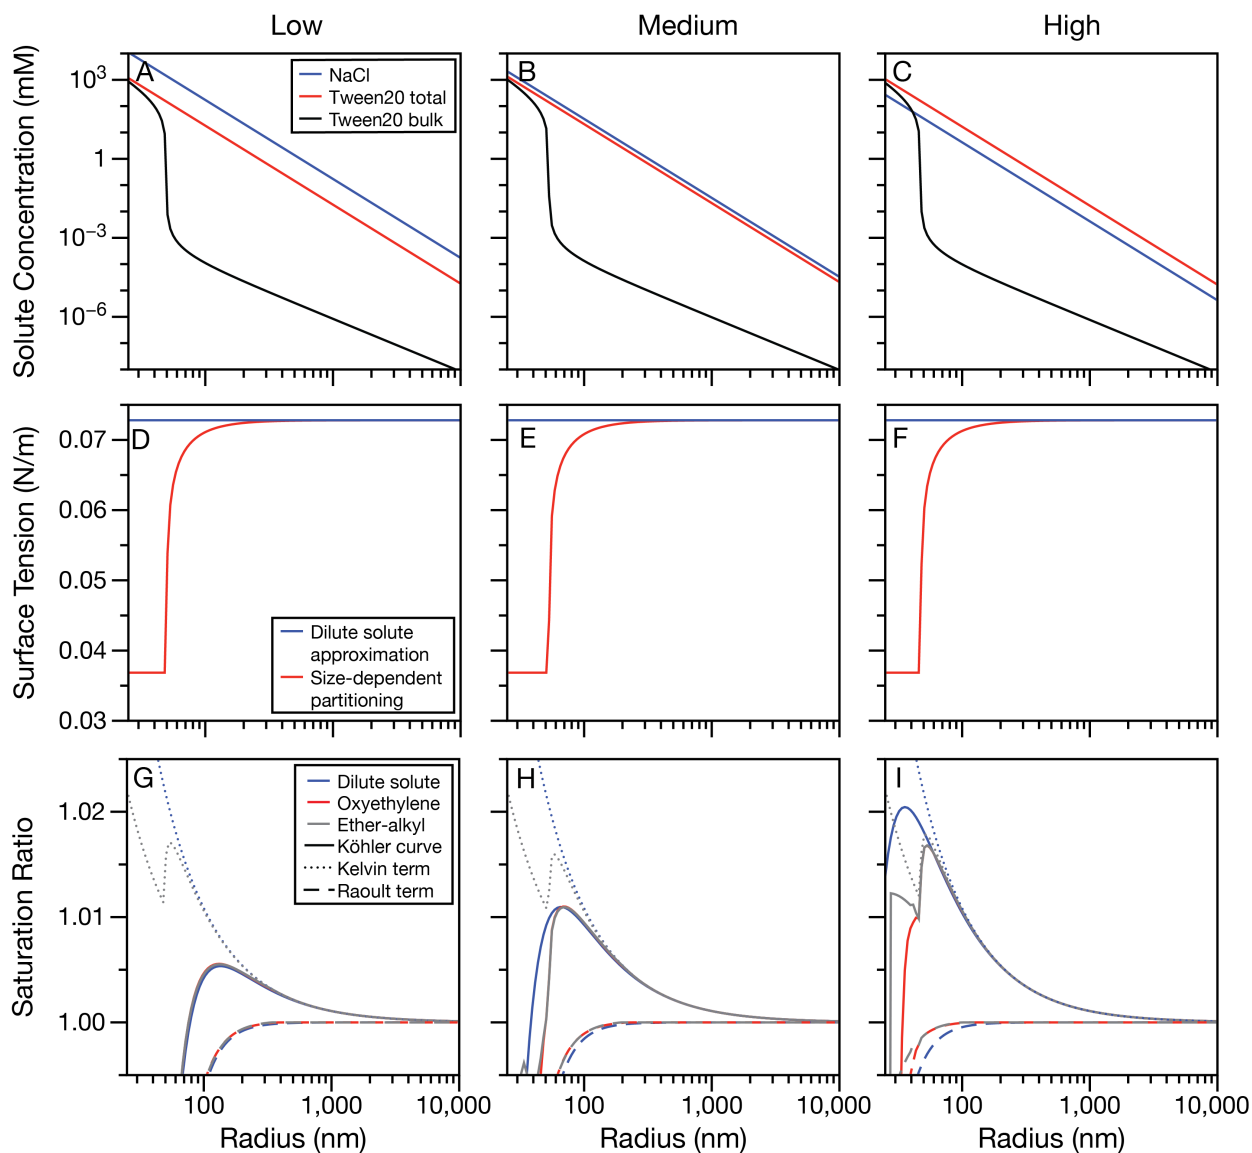

Figure S4: Solute concentration (A-C), surface tension (D-E), and saturation ratio (G-I) for 25 nm radius dry particles containing low (column 1,  $w_{org} = 0.689$ ), medium (column 2,  $w_{org} = 0.930$ ), and high (column 3,  $w_{org} = 0.988$ ) Tween20 mass fractions. Köhler curves are calculated using the dilute solute approximation as well as using the AIOMFAC activity interpolations using the oxyethylene and ether-alkyl subgroup descriptions.

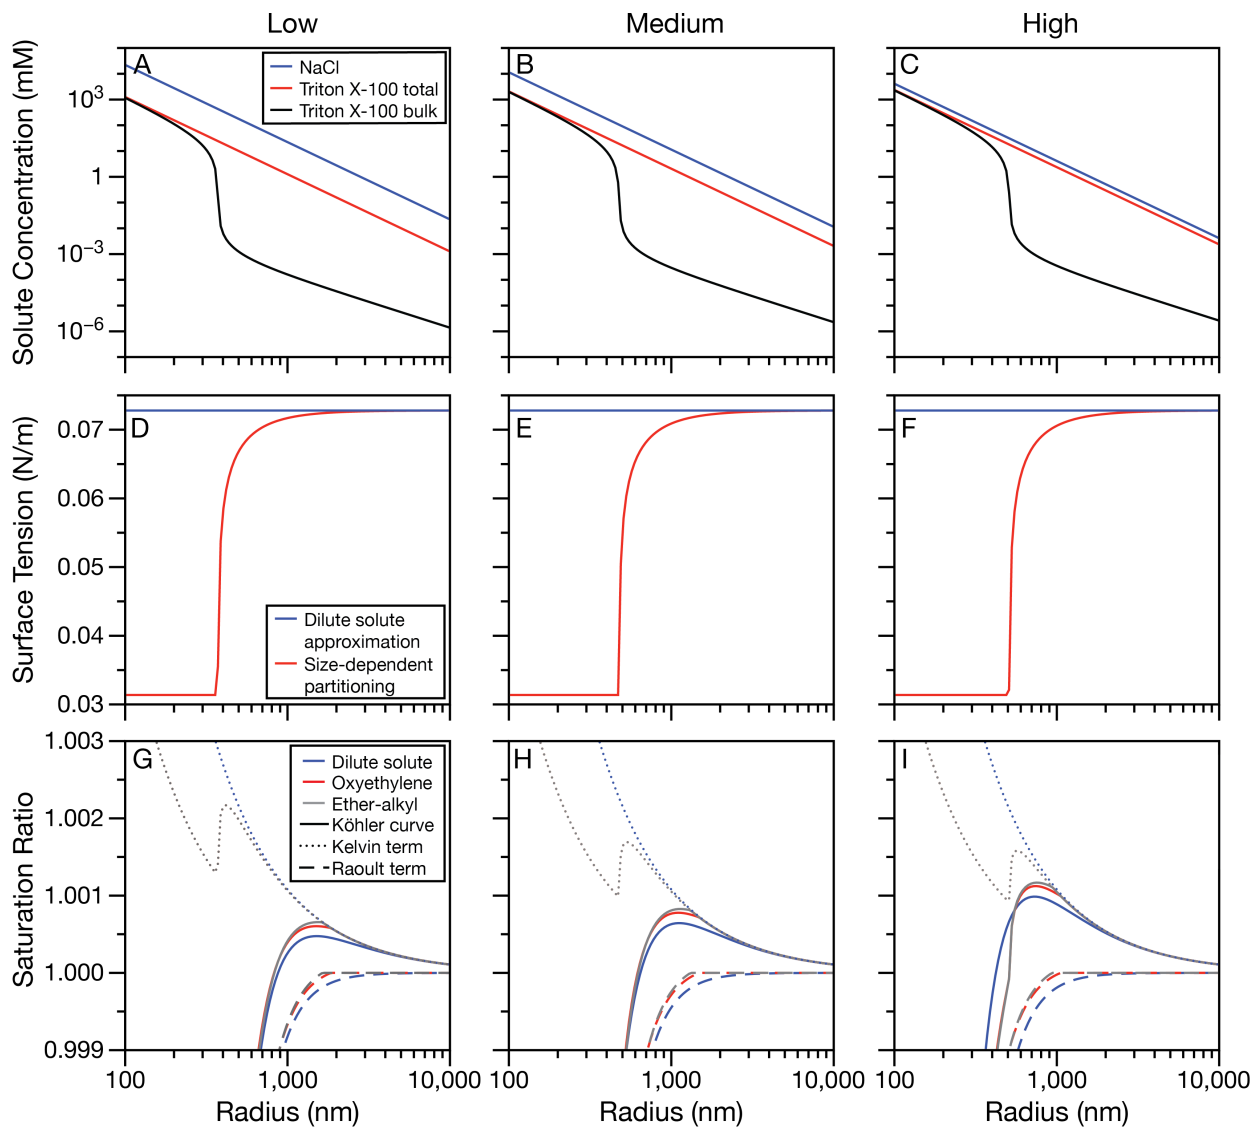

Figure S5: Solute concentration (A-C), surface tension (D-E), and saturation ratio (G-I) for 100 nm radius dry particles containing low (column 1,  $w_{org} = 0.386$ ), medium (column 2,  $w_{org} = 0.667$ ), and high (column 3,  $w_{org} = 0.864$ ) Triton X-100 mass fractions. Köhler curves are calculated using the dilute solute approximation as well as using the AIOMFAC activity interpolations using the oxyethylene and ether-alkyl subgroup descriptions.

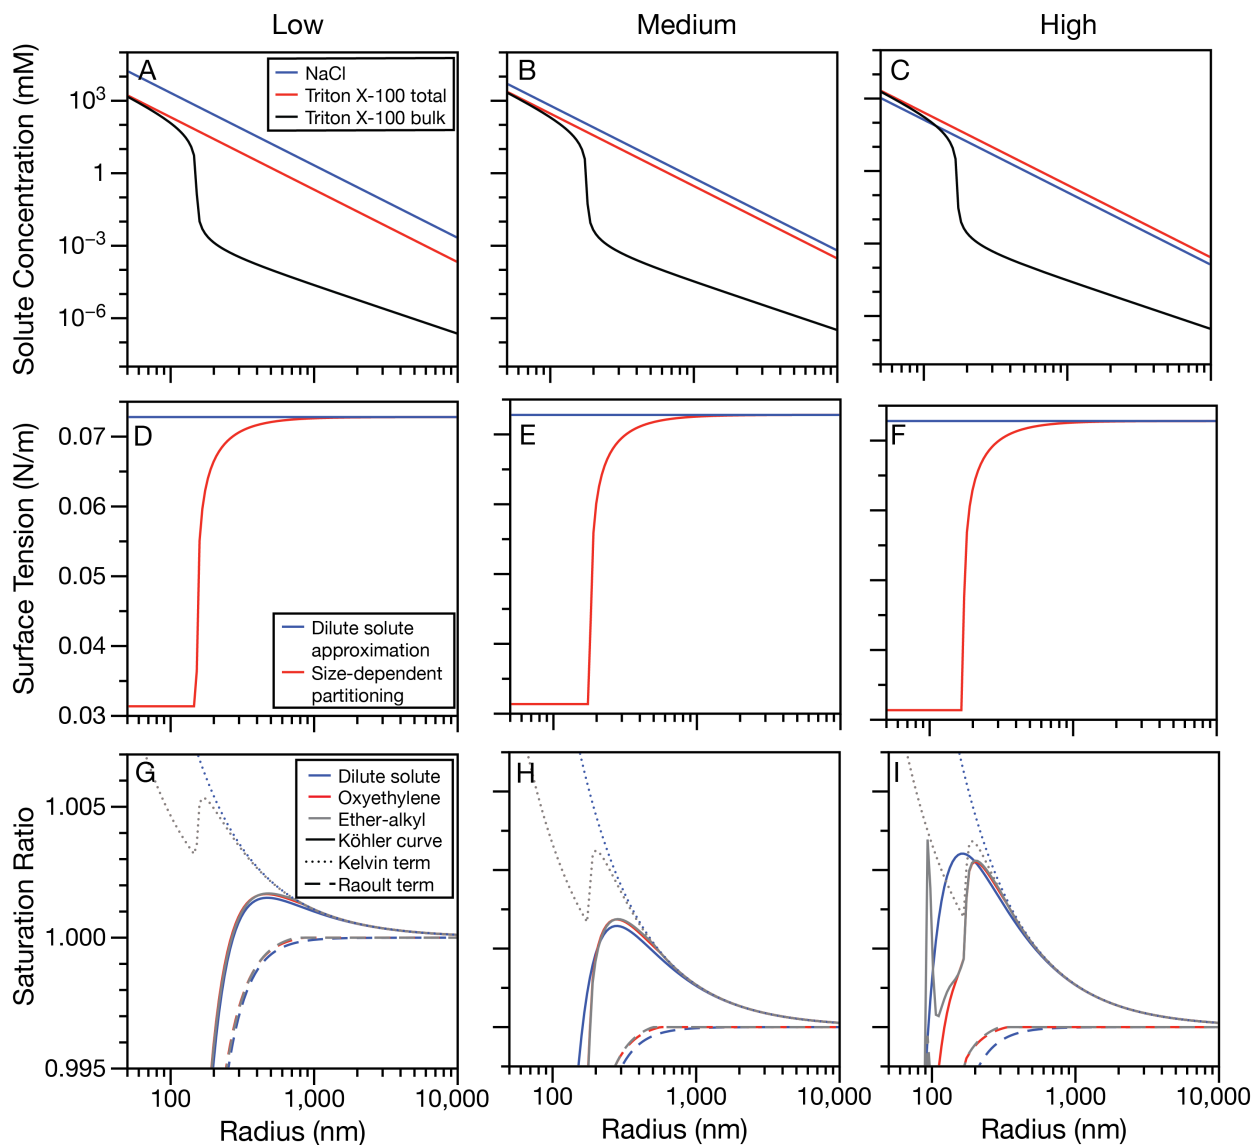

Figure S6: Solute concentration (A-C), surface tension (D-E), and saturation ratio (G-I) for 50 nm radius dry particles containing low (column 1,  $w_{org} = 0.522$ ), medium (column 2,  $w_{org} = 0.838$ ), and high (column 3,  $w_{org} = 0.660$ ) Triton X-100 mass fractions. Köhler curves are calculated using the dilute solute approximation as well as using the AIOMFAC activity interpolations using the oxyethylene and ether-alkyl subgroup descriptions.

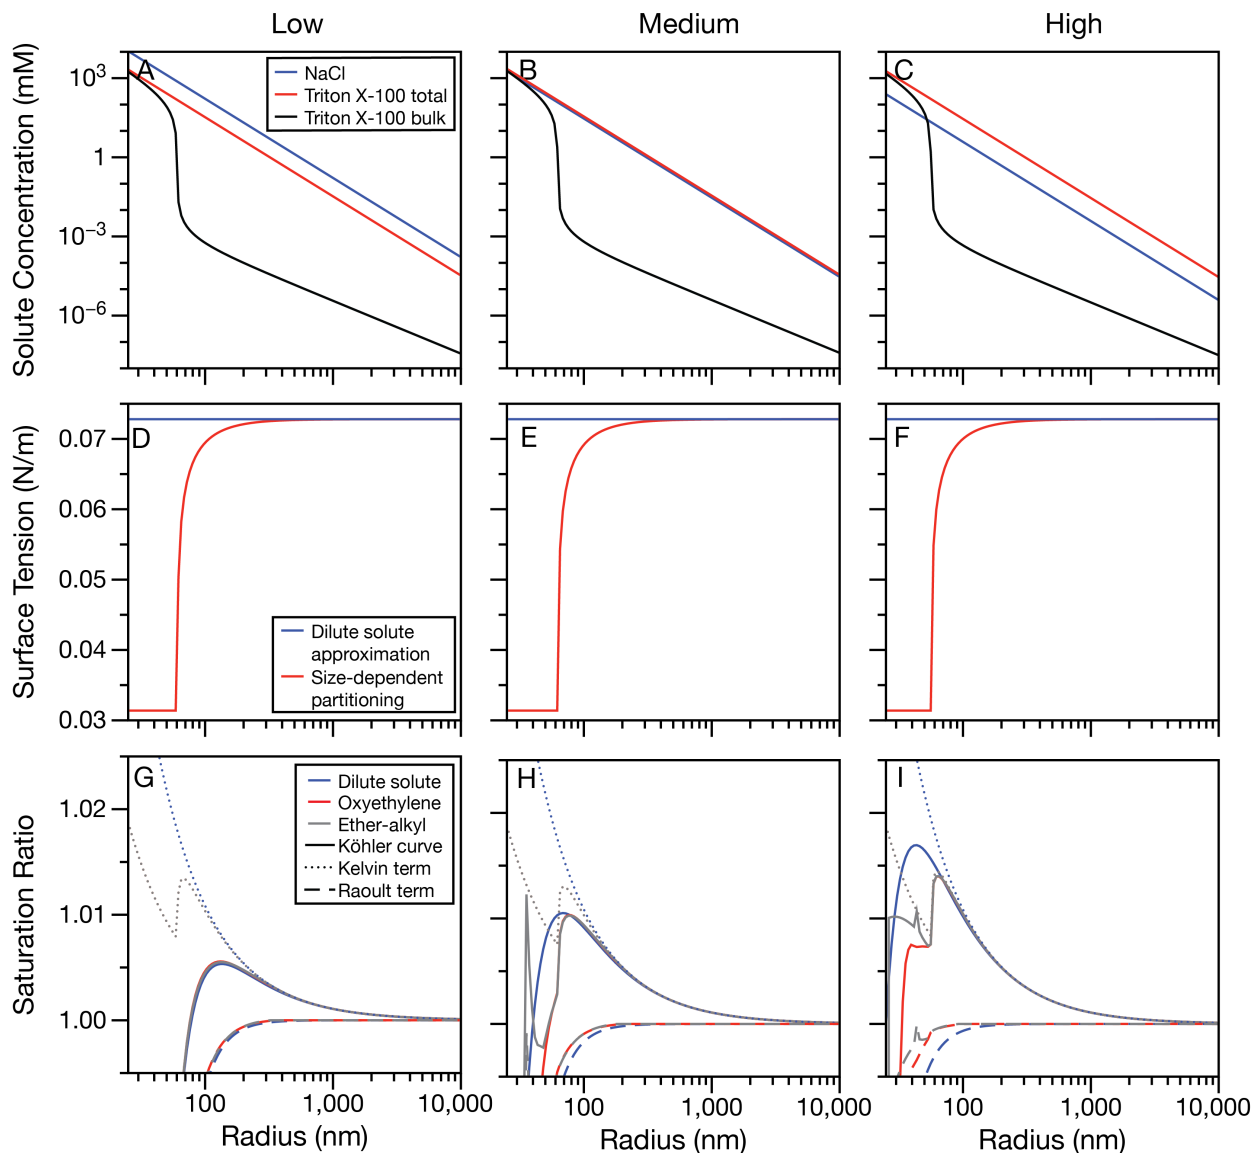

Figure S7: Solute concentration (A-C), surface tension (D-E), and saturation ratio (G-I) for 25 nm radius dry particles containing low (column 1,  $w_{org} = 0.689$ ), medium (column 2,  $w_{org} = 0.930$ ), and high (column 3,  $w_{org} = 0.988$ ) Triton X-100 mass fractions. Köhler curves are calculated using the dilute solute approximation as well as using the AIOMFAC activity interpolations using the oxyethylene and ether-alkyl subgroup descriptions.

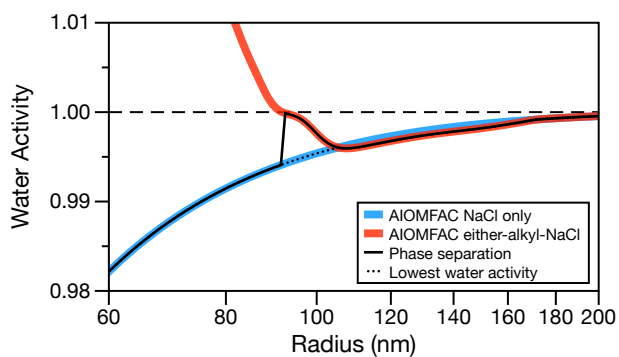

Figure S8: Water activity description during hygroscopic growth using the ether-alkyl subgroup description in AIOMFAC in the region of a discontinuity due to  $a_w$  predictions greater than unity. Phase separation: If the water activity for the surfactant-NaCl mixture (red line) is predicted to be greater than unity (dashed black line), then the water activity from the NaCl concentration only (blue line) is used. The solid black line shows the water activity using this approach. Lowest water activity: The lower of either the either-alkyl-NaCl or NaCl-only water activity interpolations is used. The dotted black line shows the water activity using this approach.

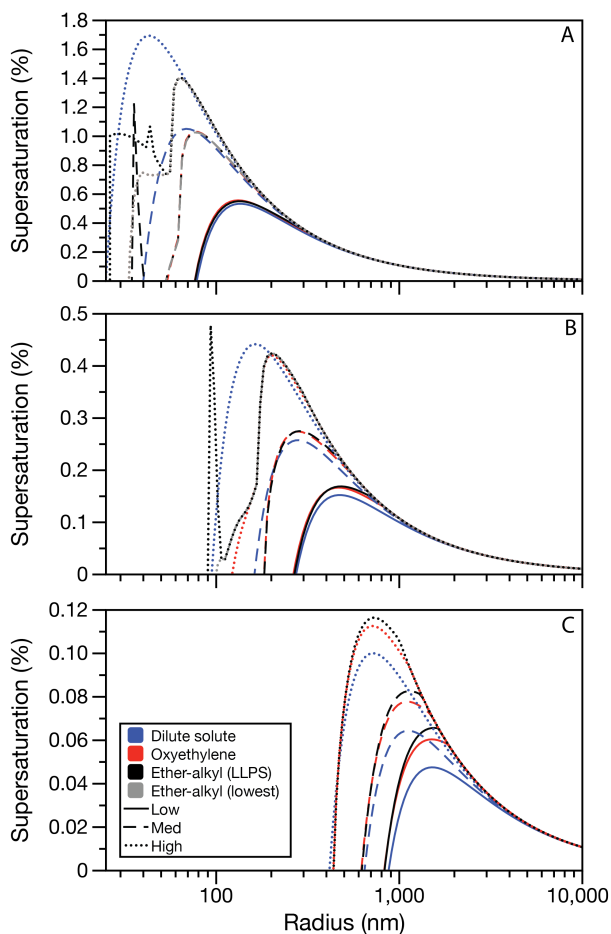

Figure S9: Köhler curves for particles with dry radius A) 25 nm, B) 50 nm, and C) 100 nm and low, medium, and high Triton X-100 mass fractions (Table 1). The water activity for the ether-alkyl subgroup description is shown using both the LLPS assumption and the lowest water activity assumption, where the calculated water activity goes above unity at any point during activation (25 nm medium and high, as well as 50 nm high).

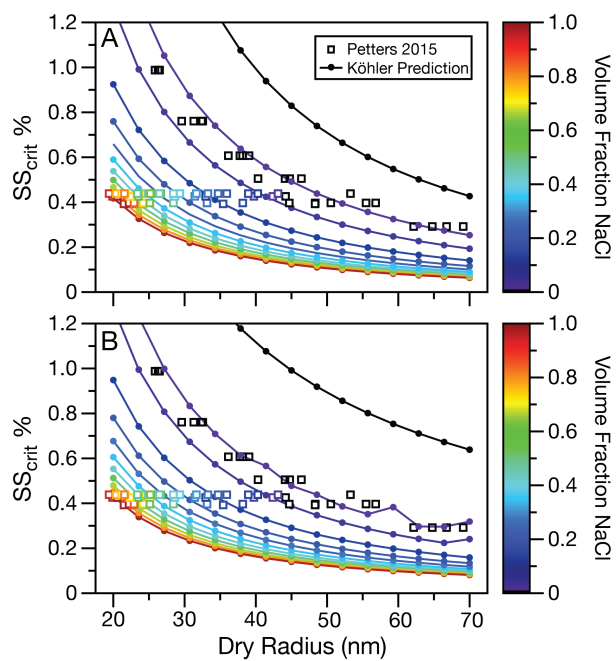

Figure S10: Critical supersaturation ( $SS_{crit}$ ) predicted using Köhler theory with size- and composition-dependent surfactant partitioning using A) without surfactant partitioning and B) the ether subgroup (liquid-liquid phase separation) to determine droplet water activity. CCN measurements from Petters 2015 are overlaid.<sup>3</sup>

Table S1: Critical supersaturation ( $SS^*$ ) and critical radii ( $r^*$ ) for 25, 50 and 100 nm dry radius particles containing low, medium, and high surfactant mass fractions.

| <b>Tween20</b>      |                 |                 |                 |                 |                 |                 |
|---------------------|-----------------|-----------------|-----------------|-----------------|-----------------|-----------------|
|                     | low             |                 | medium          |                 | high            |                 |
|                     | $SS_{crit}$ (%) | $r_{crit}$ (nm) | $SS_{crit}$ (%) | $r_{crit}$ (nm) | $SS_{crit}$ (%) | $r_{crit}$ (nm) |
| 25 nm               |                 |                 |                 |                 |                 |                 |
| dilute              | 0.53416         | 131.68          | 1.09575         | 65.0721         | 2.04448         | 35.5633         |
| oxyethylene         | 0.55602         | 131.68          | 1.09988         | 68.4323         | 1.67979         | 53.2023         |
| ether               | 0.55183         | 131.68          | 1.09329         | 68.4323         | 1.68071         | 53.2023         |
| 50 nm               |                 |                 |                 |                 |                 |                 |
| dilute              | 0.15234         | 463.222         | 0.26014         | 271.489         | 0.47637         | 152.188         |
| oxyethylene         | 0.1651          | 463.222         | 0.27591         | 271.489         | 0.46702         | 173.936         |
| ether (LLPS)        | 0.16746         | 484.313         | 0.27645         | 283.85          | 0.55420         | 89.1955         |
| ether (lowest)      |                 |                 |                 |                 | 0.46825         | 173.937         |
| 100 nm              |                 |                 |                 |                 |                 |                 |
| dilute              | 0.04754         | 1501.31         | 0.06448         | 1101.58         | 0.1001          | 719.686         |
| oxyethylene         | 0.0588          | 1501.31         | 0.07617         | 1101.58         | 0.11263         | 719.686         |
| ether               | 0.06351         | 1560.55         | 0.08052         | 1145.05         | 0.11644         | 719.686         |
| <b>Triton X-100</b> |                 |                 |                 |                 |                 |                 |
| 25 nm               |                 |                 |                 |                 |                 |                 |
| dilute              | 0.53321         | 138.48          | 1.05109         | 68.4323         | 1.69429         | 43.4977         |
| oxyethylene         | 0.5573          | 131.68          | 1.03168         | 75.6821         | 1.39723         | 65.0721         |
| ether (LLPS)        | 0.55091         | 131.68          | 1.22762         | 35.5633         | 1.40069         | 65.0721         |
| ether (lowest)      |                 |                 | 1.02560         | 79.5901         | 1.40069         | 65.0721         |
| 50 nm               |                 |                 |                 |                 |                 |                 |
| dilute              | 0.15229         | 463.222         | 0.25758         | 283.85          | 0.44174         | 166.361         |
| oxyethylene         | 0.1666          | 463.222         | 0.27417         | 283.85          | 0.42087         | 198.792         |
| ether (LLPS)        | 0.16893         | 484.313         | 0.27502         | 283.85          | 0.47775         | 93.2566         |
| ether (lowest)      |                 |                 |                 |                 | 0.42087         | 198.792         |
| 100 nm              |                 |                 |                 |                 |                 |                 |
| dilute              | 0.04754         | 1501.31         | 0.06437         | 1101.58         | 0.09865         | 719.686         |
| oxyethylene         | 0.06042         | 1501.31         | 0.0778          | 1101.58         | 0.11231         | 748.083         |
| ether               | 0.06568         | 1560.55         | 0.08265         | 1145.05         | 0.11679         | 748.083         |

## References

- (1) Werner, E. K.; Hammond, M.; Bain, A. Surface tension predictions during hygroscopic growth and cloud droplet activation using a simple kinetic surfactant partitioning model. *Aerosol Sci. Technol.* **2025**, *59*, 781–793.
- (2) Bain, A.; Ghosh, K.; Prisle, N. L.; Bzdek, B. R. Surface-Area-to-Volume Ratio Determines Surface Tensions in Microscopic, Surfactant-Containing Droplets. *ACS Cent. Sci.* **2023**, *9*, 2076–2083.
- (3) Petters, S. S. On the Physicochemical Processes Controlling Organic Aerosol Hygroscopicity. 2015; PhD thesis.
